# Supplementary material
Source: PubMed Central journal article supplement (PMC1794702)

## Supplementary Information

(Supplementary Methods, Supplementary Table 1, Legends to Supplementary Figures 1 and 2, References, Supplementary Figure 1, Supplementary Figure 2)

# MOM1 mediates DNA methylation-independent silencing of repetitive sequences in *Arabidopsis*

Isabelle Vaillant<sup>1</sup>, Ingo Schubert<sup>2</sup>, Sylvette Tourmente<sup>1</sup> and Olivier Mathieu<sup>1\*</sup>

<sup>1</sup>UMR CNRS 6547, BIOMOVE, Université Blaise Pascal, 24 Avenue des Landais, 63177 Aubière Cedex, France.

<sup>2</sup>Department of Cytogenetics, Institute of Plant Genetics and Crop Plant Research (IPK), Corrensstrasse 3, D-06466 Gatersleben, Germany.

## Supplementary Methods

### Probes used in gel blot analyses

We amplified the probes to detect 5S rDNA and *106B* repeats by PCR from genomic DNA using 5S-F and 5S-R primers (Kanno et al., 2005) and 106B-F and 106B-R, respectively. Probes to detect 180-bp repeats, *TSI* and *RAN* (for RAS-related nuclear protein; Haizel et al., 1997) were amplified from plasmids carrying two tandemly-repeated 180-bp repeats, *TSI*-A15 and *RAN* fragments, respectively. Probe to detect *MOM1* promoter region was amplified from genomic DNA using primers MOM1-F and MOM1-R; and probe to detect *MOM1* transcript was amplified from cDNA using CD29-F and CLA3-R (Tariq et al., 2002). Probes were labeled with [ $\alpha$ -<sup>32</sup>P]dCTP using random hexamer priming (Megaprime DNA labeling system; Amersham).

### Chromatin immunoprecipitation PCR conditions

Following chromatin immunoprecipitation with the appropriate antibodies, 5S rDNA, Ta2 (a heterochromatin control), the phosphofructokinase  $\beta$ -subunit gene At4g04040 and *TUBULIN 8* (euchromatin controls) were amplified using primers listed in supplementary table 1 in a 20  $\mu$ l PCR reaction, starting with 5 min at 95°C and followed by 21-40 (depending on the region being amplified) cycles of 95°C, 60°C (54°C for 5S rDNA) and 72°C (30 s each) with a final elongation of 5 min at 72°C. PCR products were resolved on a 3% agarose gel.

### Semi-quantitative RT-PCR conditions

PCR conditions using gene-specific primers were as follow:

*5S-210* and *5S-140* transcripts were amplified using RTPCR5S1 and 5SUNIV2 primers for 33 cycles (94°C for 45 s, 51°C for 45 s, 72°C for 30 s);

*Ta3* was amplified using primers Ta3 middle-F and Ta3-middle-R (Johnson et al., 2002) for 35 cycles (94°C for 45 s, 55°C for 45 s, 72°C for 1 min);

*MULE* At1g43280 was amplified using primers At1g43280-F and At1g43280-R for 35 cycles (94°C for 45 s, 55°C for 45 s, 72°C for 1 min);

*106B* was amplified using primers 106B-F and 106B-R (May et al., 2005) for 35 cycles (94°C for 45 s, 55°C for 45 s, 72°C for 1 min);

*MULE* At1g40097 was amplified using primers At1g40097-F and At1g40097-R for 35 cycles (94°C for 45 s, 50°C for 45 s, 72°C for 1 min);

*Athila*-LTR was amplified using primers Athila LTR-F and Athila LTR-R for 35 cycles (94°C for 45 s, 55°C for 45 s, 72°C for 90 s);

*FWAtr* was amplified using primers FWAtr-F and FWAtr-R (Pontier et al., 2005) for 40 cycles (94°C for 45 s, 60°C for 45 s, 72°C for 1 min);

180-bp repeats were amplified using primers 180(all)-F and 180(all)-R (Johnson et al., 2002) for 30 cycles (94°C for 30 s, 60°C for 30 s, 72°C for 90 s)

*ACT2* was amplified using ACT2-F and ACT2-R primers 25 cycles (95°C for 30 s, 55°C for 30 s, 72°C for 30 s).

*AtSN1* transcripts were detected using AST15 and ATSN1-F4 primers as described (Herr et al., 2005). All PCRs were ended by a final elongation of 10 min at 72°C. Reverse transcription reactions and cDNA amplification of *MOM1* transcript were performed as previously described (Tariq et al., 2002).

### **Real-time RT-PCR**

Total RNA was extracted using TRI-reagent (Sigma) and aliquots of 3 µg were treated with the RQ1-DNase (Promega) to remove genomic DNA. Absence of genomic DNA contamination in the RNA samples was then controlled by verifying that a PCR (45 cycles) with 180(all)-F and 180(all)-R yielded no amplification. cDNA synthesis was performed on 1 µg total RNA using random hexanucleotides (Roche) as described previously (Mathieu et al., 2003). One microliter cDNA was used in a 25 µl PCR reaction using the Platinum SYBR Green qPCR SuperMix-UDG (Invitrogen) and data were collected using a Roche LightCycler. Each real-time RT-PCR run included, as an internal reference, a reaction for *ACTIN2*. The comparative threshold cycle (*C<sub>t</sub>*) method was used to determine relative RNA levels. The primer sets were 106Bq-F and 106Bq-R-1 for *106B*, 5SUNIV2 and RTPCR5S1 for *5S-210*, ACT2-F and ACT2-R for *ACTIN2* (See supplementary table 1).

### **Detection of minor 5S rRNAs**

Reverse transcription reactions were performed as described (Mathieu et al., 2003). 5S cDNA amplification was performed on 50 ng of the cDNA samples using the primers RTPCR5S1 and RTPCR5S2 as described previously (Mathieu et al., 2003). Complete removal of the 5S genomic rDNA in the reverse-transcribed samples was controlled by verifying that a PCR step (40 cycles) using primers 5SUNIV1 and 5SUNIV2 yielded no amplification (Mathieu et al., 2003). PCR products were subcloned in the pGEM-T easy plasmid and sequencing was performed using a CEQ 2000 Dye terminator cycle sequencer (Beckman). Minor 5S rRNA frequencies were compared with Fisher's exact test for a 2x2 contingency table and probabilities were calculated from a one-tailed test.

## Supplementary Table 1.

List of primers

| Target                          | Primer              | Sequence (5'-3')                  | Methods                           |
|---------------------------------|---------------------|-----------------------------------|-----------------------------------|
| <i>5S rDNA</i>                  | RTPCR5S1            | GGATGCGATCATACCAG                 | RT-PCR, ChIP,<br>real-time RT-PCR |
|                                 | RTPCR5S2            | GAGGGATGCAMCACSAG                 | RT-PCR                            |
|                                 | 5SUNIV1             | CTTTTCGGGCNTTTTNGTG               | Genomic control                   |
|                                 | 5SUNIV2             | CGAAAAGGTATCACATGCC               | RT-PCR, ChIP,<br>real-time RT-PCR |
|                                 | 5S-F                | TTGGGCTATATTACGGACCCA             | Southern blot                     |
|                                 | 5S-R                | GTCCTGCTTCTTCGTCGGAG              | probe                             |
| <i>TUBULIN8</i>                 | TUB8-F              | ATAACCGTTTCAAATTCTCTCTCTC         | ChIP                              |
|                                 | TUB8-R              | TGCAAATCGTTTCTCTCCTTG             |                                   |
| <i>Ta2</i>                      | Ta2-F               | AAACGATGCGTTGGGATAGGTC            | ChIP                              |
|                                 | Ta2-R               | ATACTCTCCACTTCCCCTTTTCTTTTA       |                                   |
| <i>Ta3</i>                      | Ta3 middle-F        | GATTCTTACTGTAAAGAACATGGCATTGAGAGA | RT-PCR                            |
|                                 | Ta3 middle-R        | TCCAAATTTCTGAGGTGCTTGTAACC        |                                   |
| <i>MULE</i><br><i>At1g40097</i> | <i>At1g40097</i> -F | GGTTTTGATACCGAATTTTG              | RT-PCR                            |
|                                 | <i>At1g40097</i> -R | AGCGGAGGAATATACAACCTC             |                                   |
| <i>MULE</i><br><i>At1g43280</i> | <i>At1g43280</i> -F | GGTTAGGAAAAGTGAAGCTTGAG           | RT-PCR                            |
|                                 | <i>At1g43280</i> -R | CCAGTGAGACAAAGGCATAC              |                                   |
| <i>Athila</i> -LTR              | <i>Athila</i> LTR-F | TGTTTCATCCACGTTTCATCTC            | RT-PCR                            |
|                                 | <i>Athila</i> LTR-R | AGCAATAAGCGCAACTAATCC             |                                   |
| <i>AtSN1</i>                    | ATSN1-F4            | AAAATAAGTGGTGGTTGTACAAGC          | RT-PCR                            |
|                                 | ATS15               | ACCAACGTGCTGTTGGCCAGTGGTAAATC     |                                   |
| <i>FWAtr</i>                    | FWAtr-F             | TCCCATTCAACATTCATACGAGCGCCGC      | RT-PCR                            |
|                                 | FWAtr-R             | TCTGATATTTGGCTGGAAAAACAACAATAATC  |                                   |
| <i>ACTIN2</i>                   | ACT2-F              | CTAAGCTCTCAAGATCAAAGGC            | RT-PCR                            |
|                                 | ACT2-R              | AACATTGCAAAGAGTTTCAAGG            |                                   |
| <i>106B</i> repeats             | 106B-F              | TTGATTGATAGATCCCTTCTGGA           | RT-PCR                            |
|                                 | 106B-R              | CGAGGATGGGGTAATTGAGT              |                                   |
|                                 | 106Bq-F             | TCATTATGCTAGGTGGTTGA              | Real-time RT-PCR                  |
|                                 | 106Bq-R-1           | GACAACAAGTTCATTAACCA              |                                   |

|                                      |            |                               |                                    |
|--------------------------------------|------------|-------------------------------|------------------------------------|
| 180-bp repeats                       | 180(all)-F | ACCATCAAAGCCTTGAGAAGCA        | RT-PCR                             |
|                                      | 180(all)-R | CCGTATGAGTCTTTGTCTTTGTATCTTCT |                                    |
| <i>MOM1</i>                          | CD29-F     | GCTCCTCTGCAACTTCAGCAATCATC    | RT-PCR; Probe<br>for Northern blot |
|                                      | CLA3-R     | TCATCAATTTGTGTTGTGTGATCAGA    |                                    |
|                                      | MOM1-F     | CCAAACTGGTAATTAACGTTTG        | Southern blot<br>probe             |
|                                      | MOM1-R     | TTACTGACAAGAAGCTTTTGGG        |                                    |
| <i>PFK-β</i><br>( <i>At4g04040</i> ) | B8F        | GCCACGAAAACCAAACAGAC          | ChIP                               |
|                                      | B8R        | CCGGAATTTTCGATCAATCCT         |                                    |

### Legend to Supplementary Figure 1.

Sequence alignments of 5S-210 transcripts.

(A) Multiple sequence alignment of 5S-210 RT-PCR products from Columbia (Col) wild-type plants with the major 5S rRNA sequence. (B) Multiple sequence alignment of 5S-210 RT-PCR products from *ddm1-2* mutant plants with the major 5S rRNA sequence. Nucleotide positions diverging from the sequence of the major 5S rRNA are highlighted in yellow. Dots highlighted in yellow indicate the position of the chromosome-specific T-stretch (Cloix et al., 2002). Alignments were carried out using the CLUSTALW v.1.8 software (<http://searchlauncher.bcm.tmc.edu/multi-align/Options/clustalw.html>).

### Legend to Supplementary Figure 2.

DNA methylation of *TSI*, *106B* LTR-like repeats and 180-bp satellite repeats.

Genomic DNA was purified from leaves of three-week-old plants and digested with *HpaII* or *MspI*. The DNA gel-blot was successively hybridized to *TSI*-A15 (A), *106B* (B) and 180-bp probes (C). WT, wild-type; *Ler*, Landsberg *erecta*; Zh, Zürich.

### References for Supplementary Information

- Cloix, C., Tutois, S., Yukawa, Y., Mathieu, O., Cuvillier, C., Espagnol, M.C., Picard, G. and Tourmente, S. (2002) Analysis of the 5S RNA pool in *Arabidopsis thaliana*: RNAs are heterogeneous and only two of the genomic 5S loci produce mature 5S RNA. *Genome Res*, **12**, 132-144.
- Haizel, T., Merkle, T., Pay, A., Fejes, E. and Nagy, F. (1997) Characterization of proteins that interact with the GTP-bound form of the regulatory GTPase Ran in *Arabidopsis*. *Plant J*, **11**, 93-103.
- Herr, A.J., Jensen, M.B., Dalmay, T. and Baulcombe, D.C. (2005) RNA polymerase IV directs silencing of endogenous DNA. *Science*, **308**, 118-120.
- Johnson, L., Cao, X. and Jacobsen, S. (2002) Interplay between two epigenetic marks. DNA methylation and histone H3 lysine 9 methylation. *Curr Biol*, **12**, 1360-1367.

- Kanno, T., Huettel, B., Mette, M.F., Aufsatz, W., Jalgot, E., Daxinger, L., Kreil, D.P., Matzke, M. and Matzke, A.J. (2005) Atypical RNA polymerase subunits required for RNA-directed DNA methylation. *Nat Genet*, **37**, 761-765.
- Mathieu, O., Jasencakova, Z., Vaillant, I., Gendrel, A.V., Colot, V., Schubert, I. and Tourmente, S. (2003) Changes in 5S rDNA chromatin organization and transcription during heterochromatin establishment in Arabidopsis. *Plant Cell*, **15**, 2929-2939.
- May, B.P., Lippman, Z.B., Fang, Y., Spector, D.L. and Martienssen, R.A. (2005) Differential Regulation of Strand-Specific Transcripts from Arabidopsis Centromeric Satellite Repeats. *PLoS Genet*, **1**, e79.
- Pontier, D., Yahubyan, G., Vega, D., Bulski, A., Saez-Vasquez, J., Hakimi, M.A., Lerbs-Mache, S., Colot, V. and Lagrange, T. (2005) Reinforcement of silencing at transposons and highly repeated sequences requires the concerted action of two distinct RNA polymerases IV in Arabidopsis. *Genes Dev*, **19**, 2030-2040.
- Tariq, M., Habu, Y. and Paszkowski, J. (2002) Depletion of MOM1 in non-dividing cells of Arabidopsis plants releases transcriptional gene silencing. *EMBO Rep*, **3**, 951-955.

# Supplementary Fig 1A

RTPCR5S1

----->

```

Major 5S rRNA 1 GGATGCGATCATAACCAGCACTAATGCACCGGATCCCATCAGAACTCCGCAGTTAAGCGTGCTTGGGCGAGAGTAGTACTA
col_1 1 GGATGCGATCATAACCAGCACTAATGCACCGGATCCCATCAGAACTCCGCAGTTAAGCGTGCTTGGGCGAGAGTAGTACTA
col_2 1 GGATGCGATCATAACCAGCACTAATGCACCGGATCCCATCAGAACTCCGCAGTTAAGCGTGCTTGGGCGAGAGTAGTACTA
col_3 1 GGATGCGATCATAACCAGCACTAATGCACCGGATCCCATCAGAACTCCGCAGTTAAGCGTGCTTGGGCGAGAGTAGTACTA
col_4 1 GGATGCGATCATAACCAGCACTAATGCACCGGATCCCATCAGAACTCCGCAGTTAAGCGTGCTTGGGCGAGAGTAGTACTA
col_5 1 GGATGCGATCATAACCAGCACTAATGCACCGGATCCCATCAGAACTCCGCAGTTAAGCGTGCTTGGGCGAGAGTAGTACTA
col_6 1 GGATGCGATCATAACCAGCACTAATGCACCGGATCCCATCAGAACTCCGCAGTTAAGCGTGCTTGGGCGAGAGTAGTACTA
col_7 1 GGATGCGATCATAACCAGCACTAATGCACCGGATCCCATCAGAACTCCGCAGTTAAGCGTGCTTGGGCGAGAGTAGTACTA
col_8 1 GGATGCGATCATAACCAGCACTAATGCACCGGATCCCATCAGAACTCCGCAGTTAAGCGTGCTTGGGCGAGAGTAGTACTA
col_9 1 GGATGCGATCATAACCAGCACTAATGCACCGGATCCCATCAGAACTCCGCAGTTAAGCGTGCTTGGGCGAGAGTAGTACTA
col_10 1 GGATGCGATCATAACCAGCACTAATGCACCGGATCCCATCAGAACTCCGCAGTTAAGCGTGCTTGGGCGAGAGTAGTACTA
col_11 1 GGATGCGATCATAACCAGCACTAATGCACCGGATCCCATCAGAACTCCGCAGTTAAGCGTGCTTGGGCGAGAGTAGTACTA
col_12 1 GGATGCGATCATAACCAGCACTAATGCACCGGATCCCATCAGAACTCCGCAGTTAAGCGTGCTTGGGCGAGAGTAGTACTA
col_13 1 GGATGCGATCATAACCAGCACTAATGCACCGGATCCCATCAGAACTCCGCAGTTAAGCGTGCTTGGGCGAGAGTAGTACTA
col_14 1 GGATGCGATCATAACCAGCACTAATGCACCGGATCCCATCAGAACTCCGCAGTTAAGCGTGCTTGGGCGAGAGTAGTACTA
col_15 1 GGATGCGATCATAACCAGCACTAATGCACCGGATCCCATCAGAACTCCGCAGTTAAGCGTGCTTGGGCGAGAGTAGTACTA
  
```

```

Major 5S rRNA 81 GGATGGGTGACCTCCCGGGAAGTCCTCGTGTTCATCCCTCT-----TTTATGTTTAACTTTT-----TGGTTAA AAC
col_1 81 GGATGGGTGACCTCCCGGGAAGTCCTCGTGTTCATCCCTCTTTTATGTTTAACTTTT-----TGGTTAA AAC
col_2 81 GGATGGGTGACCTCCCGGGAAGTCCTCGTGTTCATCCCTCTTTTATGTTTAACTTTT-----TGGTTAA AAC
col_3 81 GGATGGGTGACCTCCCGGGAAGTCCTCGTGTTCATCCCTCTTTTATGTTTAACTTTT-----TGGTTAA AAC
col_4 81 GGATGGGTGACCTCCCGGGAAGTCCTCGTGTTCATCCCTCTTTT-----GGTTAA AAC
col_5 81 GGATGGGTGACCTCCCGGGAAGTCCTCGTGTTCATCCCTCTTTTATGTTTAACTTTT-----TGGTTAA AAC
col_6 81 GGATGGGTGACCTCCCGGGAAGTCCTCGTGTTCATCCCTCTTTTATGTTTAACTTTT-----TGGTTAA AAC
col_7 81 GGATGGGTGACCTCCCGGGAAGTCCTCGTGTTCATCCCTCTTTTATGTTTAACTTTT-----TGGTTAA AAC
col_8 81 GGATGGGTGACCTCCCGGGAAGTCCTCGTGTTCATCCCTCTTTTATGTTTAACTTTT-----TGGTTAA AAC
col_9 81 GGATGGGTGACCTCCCGGGAAGTCCTCGTGTTCATCCCTCTTTTATGTTTAACTTTT-----TGGTTAA AAC
col_10 81 GGATGGGTGACCTCCCGGGAAGTCCTCGTGTTCATCCCTCTTTTATGTTTAACTTTT-----TGGTTAA AAC
col_11 81 GGATGGGTGACCTCCCGGGAAGTCCTCGTGTTCATCCCTCTTTT-----TGGTTAA AAC
col_12 81 GGATGGGTGACCTCCCGGGAAGTCCTCGTGTTCATCCCTCTTTT-----TGGTTAA AAC
col_13 81 GGATGGGTGACCTCCCGGGAAGTCCTCGTGTTCATCCCTCTTTTATGTTTAACTTTT-----TGGTTAA AAC
col_14 81 GGATGGGTGACCTCCCGGGAAGTCCTCGTGTTCATCCCTCTTTTATGTTTAACTTTT-----TGGTTAA AAC
col_15 81 GGATGGGTGACCTCCCGGGAAGTCCTCGTGTTCATCCCTCTTTT-----TGGTTAA AAC
  
```

.....

```

Major 5S rRNA 156 TTTATGACTCCATAACTTTTAGACCGTGAGGCCAAACTTGGCATGTGATACCTTTTCG
col_1 153 TTTATGACTCCATAACTTTTAGACCGTGAGGCCAAACTTGGCATGTGATACCTTTTCG
col_2 157 TTTATGACTCCATAACTTTTAGACCGTGAGGCCAAACTTGGCATGTGATACCTTTTCG
col_3 135 TTTATGACTCCATAACTTTTAGACCGTGAGGCCAAACTTGGCATGTGATACCTTTTCG
col_4 154 TTTATGACTCCATAACTTTTAGACCGTGAGGCCAAACTTGGCATGTGATACCTTTTCG
col_5 156 TTTATGACTCCATAACTTTTAGACCGTGAGGCCAAACTTGGCATGTGATACCTTTTCG
col_6 156 TTTATGACTCCATAACTTTTAGACCGTGAGGCCAAACTTGGCATGTGATACCTTTTCG
col_7 156 TTTATGACTCCATAACTTTTAGACCGTGAGGCCAAACTTGGCATGTGATACCTTTTCG
col_8 156 TTTATGACTCCATAACTTTTAGACCGTGAGGCCAAACTTGGCATGTGATACCTTTTCG
col_9 156 TTTATGACTCCATAACTTTTAGACCGTGAGGCCAAACTTGGCATGTGATACCTTTTCG
col_10 156 TTTATGACTCCATAACTTTTAGACCGTGAGGCCAAACTTGGCATGTGATACCTTTTCG
col_11 140 TTTATGACTCCATAACTTTTAGACCGTGAGGCCAAACTTGGCATGTGATACCTTTTCG
col_12 144 TTTATGACTCCATAACTTTTAGACCGTGAGGCCAAACTTGGCATGTGATACCTTTTCG
col_13 158 TTTATGACTCCATAACTTTTAGACCGTGAGGCCAAACTTGGCATGTGATACCTTTTCG
col_14 157 TTTATGACTCCATAACTTTTAGACCGTGAGGCCAAACTTGGCATGTGATACCTTTTCG
col_15 142 TTTATGACTCCATAACTTTTAGACCGTGAGGCCAAACTTGGCATGTGATACCTTTTCG
  
```

<-----

5SUNIV2

# Supplementary Fig 1B

*RTPCR5S1*

----->

Major 5S rRNA 1 GGATGCGATCATAACCAGCACTAATGCACCGGATCCCATCAGAACTCCGCAGTTAAGCGTGCTTGGGCGAGAGTAGTACTA  
 ddm1-2\_1 1 GGATGCGATCATAACCAGCACTAATGCACCGGATCCCATCAGAACTCCGCAGTCAAACGTGCTTGGGCGAGAGTAGTACTA  
 ddm1-2\_2 1 GGATGCGATCATAACCAGCACTAATGCACCGGATCCCATCAGAACTCCGCAGTCAAACGTGCTTGGGCGAGAGTAGTACTA  
 ddm1-2\_3 1 GGATGCGATCATAACCAGCACTAATGCACCGGATCCCATCAGAACTCCGCAGTTAAGCGTGCTCGGGCGAGAGTAGTACTA  
 ddm1-2\_4 1 GGATGCGATCATAACCAGCACTAATGCACCGGATCCCATCAGAACTCCGCAGTTAAGCGTGCTTGGGCGAGAGTAGTACTA  
 ddm1-2\_5 1 GGATGCGATCATAACCAGCACTAATGCACCGGATCCCATCAGAACTCCGCAGTTAAGCGTGCTTGGGCGAGAGTAGTACTA  
 ddm1-2\_6 1 GGATGCGATCATAACCAGCACTAATGCACCGGATCCCATCAGAACTCCGCAGTCAAACGTGCTTGGGCGAGAGTAGTACTA  
 ddm1-2\_7 1 GGATGCGATCATAACCAGCACTAATGCACCGGATCCCATCAGAACTCCGCAGTTAAGCGTGCTCGGGCGAGAGTAGTACTA  
 ddm1-2\_8 1 GGATGCGATCATAACCAGCACTAATGCACCGGATCCCATCAGAACTCCGCAGTTAAGCGTGCTGGGCGAGAGTAGTACTA  
 ddm1-2\_9 1 GGATGCGATCATAACCAGCACTAATGCACCGGATCCCATCAGAACTCCGCAGTCAAGCGTGCTTGGGCGAGAGTAGTACTA  
 ddm1-2\_10 1 GGATGCGATCATAACCAGCACTAATGCACCGGATCCCATCAGAACTCCGCAGTTAAGCGTGCTTGGGCGAGAGTAGTACTA  
 ddm1-2\_11 1 GGATGCGATCATAACCAGCACTAATGCACCGGATCCCATCAGAACTCCGCAGTTAAGCGTGCTCGGGCGAGAGTAGTACTA  
 ddm1-2\_12 1 GGATGCGATCATAACCAGCACTAATGCACCGGATCCCATCAGAACTCCGCAGTCAAGCGTGCTTGGGCGAGAGTAGTACTA  
 ddm1-2\_13 1 GGATGCGATCATAACCAGCACTAATGCACCGGATCCCATCAGAACTCCGCAGTTAAGCGTGCTTGGGCGAGAGTAGTACTA  
 ddm1-2\_14 1 GGATGCGATCATAACCAGCACTAATGCACCGGATCCCATCAGAACTCCGCAGTCAAACGTGCTTGGGCGAGAGTAGTACTA  
 ddm1-2\_15 1 GGATGCGATCATAACCAGCACTAATGCACCGGATCCCATCAGAACTCCGCAGTTAAACGTGCTCGGGCGAGAGTAGTACTA

Major 5S rRNA 81 GGATGGGTGACCTCCCGGGAAGTCCTCGTGTTCATCCCT-----  
 ddm1-2\_1 81 GGATGGGTGACCTCCCGGGAAGTCCTCGTGTTCATCCCTCTCTTATGTTTAACTTTTGTGTTTGGTTAAACTTTA  
 ddm1-2\_2 81 GGATGGGTGACCTCCCGGGAAGTCCTCGTGTTCATCCCTCTCTTATGTTTAACTTTTGTGTTTGGTTAAACTTTA  
 ddm1-2\_3 81 GGATGGGTGACCTCCCGGGAAGTCCTCGTGTTCATCCCTCTCTTATGTTTAACTTTTGTGTTTGGTTAAACTTTA  
 ddm1-2\_4 81 GGATGGGTGACCTCCCGGGAAGTCCTCGTGTTCATCCCTCTCTTATGTTTAACTTTTGTGTTTGGTTAAACTTTA  
 ddm1-2\_5 81 GGATGGGTGACCTCCCGGGAAGTCCTCGTGTTCATCCCTCTCTTATGTTTAACTTTTGTGTTTGGTTAAACTTTA  
 ddm1-2\_6 81 GGATGGGTGACCTCCCGGGAAGTCCTCGTGTTCATCCCTCTCTTATGTTTAACTTTTGTGTTTGGTTAAACTTTA  
 ddm1-2\_7 81 GGATGGGTGACCTCCCGGGAAGTCCTCGTGTTCATCCCTCT-----TFT-----TFTTGTGTTTGGTTAAACTTTA  
 ddm1-2\_8 81 GGATGGGTGACCTCCCGGGAAGTCCTCGTGTTCATCCCTCTCTTATGTTTAACTTTTGTGTTTGGTTAAACTTTA  
 ddm1-2\_9 81 GGATGGGTGACCTCCCGGGAAGTCCTCGTGTTCATCCCTCTCTTATGTTTAACTTTTGTGTTTGGTTAAACTTTA  
 ddm1-2\_10 81 GGATGGGTGACCTCCCGGGAAGTCCTCGTGTTCATCCCTCTCTTATGTTTAACTTTTGTGTTTGGTTAAACTTTA  
 ddm1-2\_11 81 GGATGGGTGACCTCCCGGGAAGTCCTCGTGTTCATCCCTCTCTTATGTTTAACTTTTGTGTTTGGTTAAACTTTA  
 ddm1-2\_12 81 GGATGGGTGACCTCCCGGGAAGTCCTCGTGTTCATCCCTCTCTTATGTTTAACTTTTGTGTTTGGTTAAACTTTA  
 ddm1-2\_13 81 GGATGGGTGACCTCCCGGGAAGTCCTCGTGTTCATCCCTCTCTTATGTTTAACTTTTGTGTTTGGTTAAACTTTA  
 ddm1-2\_14 81 GGATGGGTGACCTCCCGGGAAGTCCTCGTGTTCATCCCTCTCTTATGTTTAACTTTTGTGTTTGGTTAAACTTTA  
 ddm1-2\_15 81 GGATGGGTGACCTCCCGGGAAGTCCTCGTGTTCATCCCTCTCTTATGTTTAACTTTTGTGTTTGGTTAAACTTTA

.....

Major 5S rRNA  
 ddm1-2\_1 160 TGACTCCATAAATTTT-AGACCGTGCGGGCAAACCTTGGCATGTGATACCTTTTCG  
 ddm1-2\_2 160 TGACTCCATAAATTTT-AGACCGTGAGGCCAAACCTTGGCATGTGATACCTTTTCG  
 ddm1-2\_3 160 TGACTCCATAAATTTT-AGACCGTGAGGCCAAACCTTGGCATGTGATACCTTTTCG  
 ddm1-2\_4 160 TGACTCCATAAATTTT-AGACCGTGAGGCCAAACCTTGGCATGTGATACCTTTTCG  
 ddm1-2\_5 160 TGACTCCATAAATTTT-AGACCGTGAGGCCAAACCTTGGCATGTGATACCTTTTCG  
 ddm1-2\_6 160 TGACTCCATAAATTTT-AGACCGTGAGGCCAAACCTTGGCATGTGATACCTTTTCG  
 ddm1-2\_7 148 TGACTCTATAAATTTT-ATACCGTGAGGCCAAACCTTGGCATGTGATACCTTTTCG  
 ddm1-2\_8 160 TGACTCCATAAATTTT-AGACCGTGAGGCCAAACCTTGGCATGTGATACCTTTTCG  
 ddm1-2\_9 160 TGACTCCATAAATTTT-AGACCGTGAGGCCAAACCTTGGCATGTGATACCTTTTCG  
 ddm1-2\_10 152 TGACTCTATAAATTTT-ATACCGTGAGGCCAAACCTTGGCATGTGATACCTTTTCG  
 ddm1-2\_11 158 TGACTCCATAAATTTT-AGACCGTGAGGCCAAACCTTGGCATGTGATACCTTTTCG  
 ddm1-2\_12 161 TGACTCCATAAATTTT-AGACCGTGAGGCCAAACCTTGGCATGTGATACCTTTTCG  
 ddm1-2\_13 154 TGACTCTATAAATTTT-ATACCGTGAGGCCAAACCTTGGCATGTGATACCTTTTCG  
 ddm1-2\_14 160 TGCTCCATAAATTTTATGACACCGTGAGGCCAAACCTTGGCATGTGATACCTTTTCG  
 ddm1-2\_15 160 TGCTCCATAAATTTATGACACCGTGAGGCCAAACCTTGGCATGTGATACCTTTTCG

<-----

*5SUNIV2*

**A**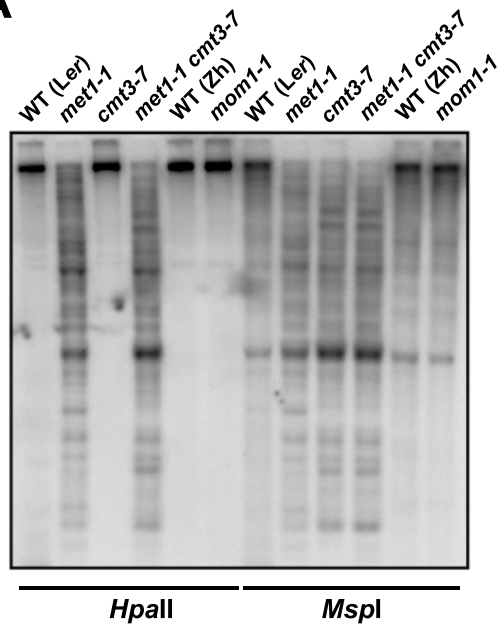**B**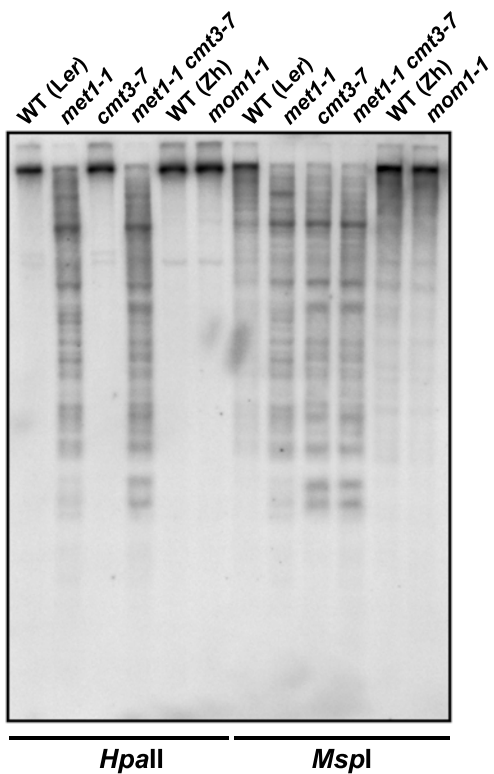**C**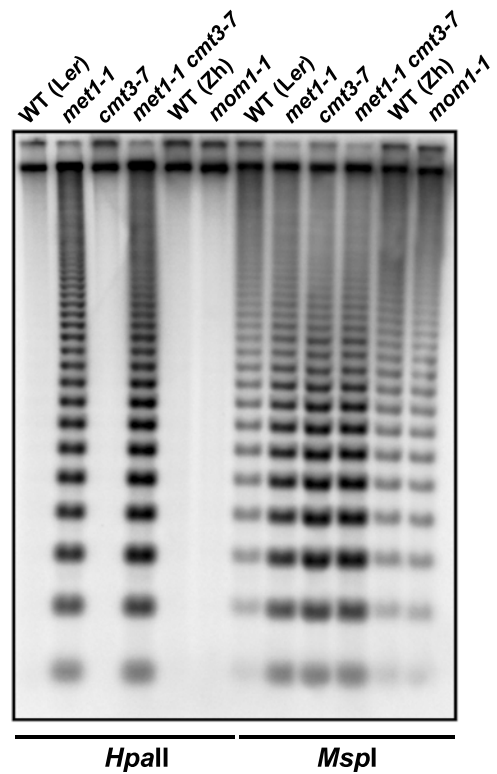

Supplement: 7400791-s1.pdf [file 7400791-s1.pdf]
